# Supplementary material for: Electronic and magnetic properties of the two-dimensional C4H-type polymer with strain effects, intrinsic defects and foreign atom substitutions
Source: Royal Society of Chemistry journal article supplement (doi:10.1039/c2cp23494g), 2012-01-01
Supplement: c2cp23494g.pdf [file c2cp23494g.pdf]

## Supporting information for

### Electronic and magnetic properties of the two-dimensional C<sub>4</sub>H-type polymer with strain effects, intrinsic defects and foreign atom substitutions

Yandong Ma, Ying Dai\*, Meng Guo, Chengwang Niu, Zhenkui Zhang, and Baibiao Huang

School of Physics, State Key Laboratory of Crystal Materials, Shandong University,  
Jinan 250100, People's Republic of China

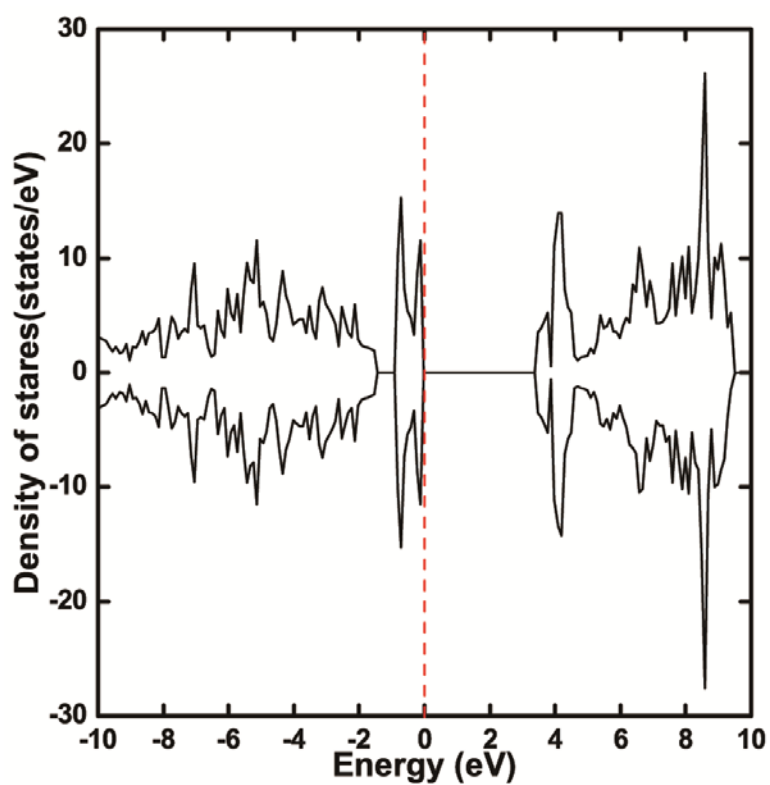

**Figure S1.** The total DOS of the pure C<sub>4</sub>H monolayer. The vertical dashed line represents the Fermi level.

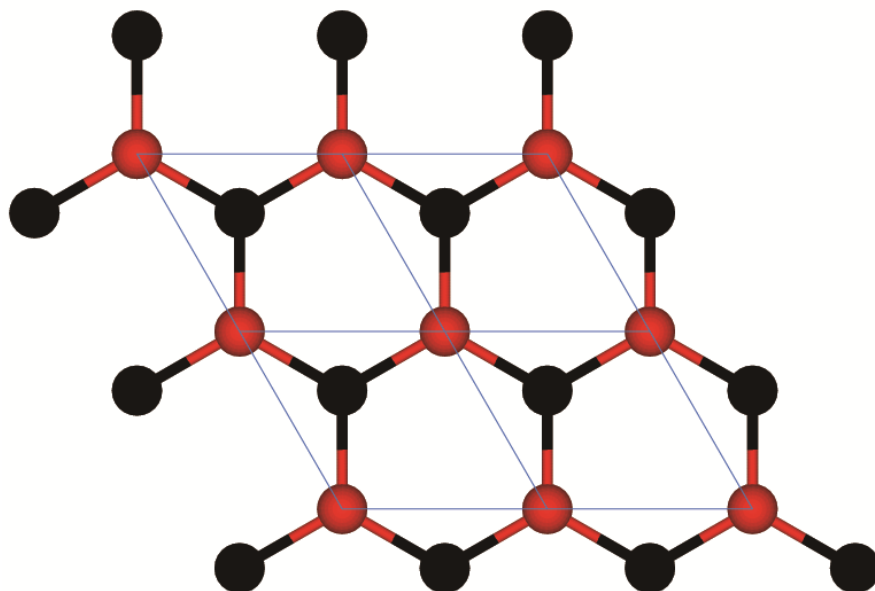

**Figure S2.** Schematic diagrams of the lattice structure of graphene. The black and red coloured sublattice sites indicate the  $C'$  and  $C''$  atoms of graphene, respectively.
